# Supplementary material for: Drosophila neprilysins control insulin signaling and food intake via cleavage of regulatory peptides
Source: eLife. 2016 Dec 6;5:e19430. doi: 10.7554/eLife.19430 (PMC5140268; doi:10.7554/eLife.19430)
Supplement: Figure 1—source data 1. — Depicted are the percentages of animals of a specific stage that do not develop into the next stage. valuesmarked in bold indicate statistically significant deviations from the respective controls. DOI: http://dx.doi.org/10.7554/eLife.19430.004 [file elife-19430-fig1-data1.xls]

## Sheet: Data
Fig. 1A Lethality assay Percentages of animals of a specific stage that do not develop into the next stage
mef2-Gal4 x UAS-Nep4A	Embryo	1st	2nd	3rd	pupa
biological replicate 1 (550 embryos)	45	19.5	18.8	100	-
biological replicate 2 (550 embryos)	46.7	23.3	17.1	100	-
biological replicate 3 (550 embryos)	37.5	15	16	100	-
mean	43.0667	19.2667	17.3	100	-
standard deviation	4.89524	4.15492	1.41067	0	-
One-way ANOVA with pairwise comparison against w1118	0.000402424	0.02553	0.000238597	7.63423e-08	-
One-way ANOVA with pairwise comparison against mef2 x w1118	0.000460361	0.03876	0.000959589	3.83649e-07	-
One-way ANOVA with pairwise comparison against UAS-Nep4A x w1118	0.000301343	0.01755	0.000160345	3.4918e-09	-
mef2-Gal4 x UAS-Nep4A inact.	Embryo	1st	2nd	3rd	pupa
biological replicate 1 (550 embryos)	10.1	5.2	3.1	100	-
biological replicate 2 (550 embryos)	9.2	9.4	3.7	100	-
biological replicate 3 (550 embryos)	13.1	9.1	4.7	100	-
mean	10.8	7.9	3.83333	100	-
standard deviation	2.04206	2.34307	0.80829	0	-
One-way ANOVA with pairwise comparison against w1118	0.94846	0.67757	0.72521	7.63423e-08	-
One-way ANOVA with pairwise comparison against mef2 x w1118	0.59809	0.47546	0.51317	3.83649e-07	-
mef2-Gal4 x UAS-nep4 RNAi	Embryo	1st	2nd	3rd	pupa
biological replicate 1 (550 embryos)	29.3	14.6	0	0	100
biological replicate 2 (550 embryos)	34.9	11.6	6	5.5	100
biological replicate 3 (550 embryos)	32.3	11.9	4	4.3	100
mean	32.1667	12.7	3.33333	3.26667	100
standard deviation	2.80238	1.65227	3.05505	2.89194	0
One-way ANOVA with pairwise comparison against w1118	0.00031192	0.13273	0.93489	0.9745	1.25904e-07
One-way ANOVA with pairwise comparison against mef2 x w1118	0.000399654	0.26088	0.80634	0.86897	1.38524e-07
One-way ANOVA with pairwise comparison against UAS-nep4 RNAi x w1118	0.000321487	0.06102	0.65111	0.64973	1.41744e-07
One-way ANOVA with pairwise comparison against mef2-Gal4 x UAS-nep4 RNAi, UAS-Nep4A	0.000252366	0.10654	0.76834	0.01624	2.13506e-08
mef2-Gal4 x UAS-nep4 RNAi, UAS-Nep4A	Embryo	1st	2nd	3rd	pupa
biological replicate 1 (130 embryos)	10.7	9.7	3.3	10.7	15.1
biological replicate 2 (150 embryos)	11.5	11.3	4.5	9.2	13.4
biological replicate 3 (110 embryos)	12.3	10.5	3.9	10.9	12.9
mean	11.5	10.5	3.9	10.2667	13.8
standard deviation	0.8	0.8	0.6	0.929157	1.15326
One-way ANOVA with pairwise comparison against w1118	0.56886	0.43284	0.65376	0.00392	0.11446
One-way ANOVA with pairwise comparison against mef2 x w1118	0.88255	0.75034	0.48084	0.01063	0.08452
One-way ANOVA with pairwise comparison against UAS-Nep4A x w1118	0.109	0.31167	0.11321	0.00109	0.17543
One-way ANOVA with pairwise comparison against UAS-nep4 RNAi x w1118	0.35225	0.2986	0.49912	0.000593395	0.10709
repo-Gal4 x UAS-Nep4A	Embryo	1st	2nd	3rd	pupa
biological replicate 1 (550 embryos)	9.2	7.5	4.9	3.8	11.4
biological replicate 2 (550 embryos)	10.6	9.8	4.9	4.9	9.9
biological replicate 3 (550 embryos)	11.4	7.3	3.7	3.9	11.3
mean	10.4	8.2	4.5	4.2	10.8667
standard deviation	1.11355	1.38924	0.69282	0.608276	0.83865
One-way ANOVA with pairwise comparison against w1118	0.6635	0.73779	0.30488	0.46926	0.75023
One-way ANOVA with pairwise comparison against repo x w1118	0.62484	0.45599	0.92543	0.8298	0.85514
One-way ANOVA with pairwise comparison against UAS-Nep4A x w1118	0.88704	0.22335	0.47388	0.91503	0.19554
repo-Gal4 x UAS-nep4 RNAi	Embryo	1st	2nd	3rd	pupa
biological replicate 1 (550 embryos)	8.9	6.9	4.3	3.6	12.5
biological replicate 2 (550 embryos)	11.3	9.9	6.1	4.7	9.3
biological replicate 3 (550 embryos)	12.5	6.9	4.3	4.5	10.4
mean	10.9	7.9	4.9	4.26667	10.7333
standard deviation	1.83303	1.73205	1.03923	0.585947	1.62583
One-way ANOVA with pairwise comparison against w1118	1	0.64961	0.21885	0.43667	0.72667
One-way ANOVA with pairwise comparison against repo x w1118	0.9633	0.70656	0.7	0.74487	0.9617
One-way ANOVA with pairwise comparison against UAS-nep4 RNAi x w1118	0.72953	0.37236	0.33223	0.73903	0.79599
elav-Gal4 x UAS-Nep4A	Embryo	1st	2nd	3rd	pupa
biological replicate 1 (260 embryos)	9.3	7.8	3.8	3.2	10.8
biological replicate 2 (220 embryos)	10.5	10.5	5.9	5.5	9.3
biological replicate 3 (190 embryos)	11.8	7.5	4.1	4.2	10.9
mean	10.5333	8.6	4.6	4.3	10.3333
standard deviation	1.25033	1.65227	1.13578	1.15326	0.896289
One-way ANOVA with pairwise comparison against w1118	0.75888	0.88898	0.33166	0.47379	0.47565
One-way ANOVA with pairwise comparison against elav x w1118	0.80729	0.85506	0.61731	0.73565	0.93969
One-way ANOVA with pairwise comparison against UAS-Nep4A x w1118	0.96613	0.40899	0.68195	0.96934	0.10069
elav-Gal4 x UAS-nep4 RNAi	Embryo	1st	2nd	3rd	pupa
biological replicate 1 (230 embryos)	9.1	7.3	3.5	2.9	11.3
biological replicate 2 (250 embryos)	9.8	10.5	4.8	4.9	9.1
biological replicate 3 (210 embryos)	12.9	8.1	3.7	3.9	12.1
mean	10.6	8.63333	4	3.9	10.8333
standard deviation	2.02237	1.66533	0.7	1	1.55349
One-way ANOVA with pairwise comparison against w1118	0.84562	0.9014	0.58901	0.65563	0.77157
One-way ANOVA with pairwise comparison against elav x w1118	0.8156	0.87343	0.85644	0.94186	0.69867
One-way ANOVA with pairwise comparison against UAS-nep4 RNAi x w1118	0.88545	0.65966	0.68271	0.77724	0.8431
mef2-Gal4 x w1118	Embryo	1st	2nd	3rd	pupa
biological replicate 1 (550 embryos)	11.7	7.7	0	0	12.7
biological replicate 2 (550 embryos)	10	13.8	5	5.3	8.9
biological replicate 3 (550 embryos)	13.3	7.9	3.2	3.3	11
mean	11.6667	9.8	2.73333	2.86667	10.8667
standard deviation	1.65025	3.46554	2.53246	2.67644	1.90351
One-way ANOVA with pairwise comparison against w1118	0.58066	0.75357	0.66514	0.8138	0.80698
repo-Gal4 x w1118	Embryo	1st	2nd	3rd	pupa
biological replicate 1 (550 embryos)	9.7	6.9	3.8	3.3	11.9
biological replicate 2 (550 embryos)	10.6	8.2	5.6	4.9	8.9
biological replicate 3 (550 embryos)	12.6	7.3	4.3	4	11.2
mean	10.9667	7.46667	4.56667	4.06667	10.6667
standard deviation	1.48436	0.665833	0.929157	0.802081	1.5695
One-way ANOVA with pairwise comparison against w1118	0.95861	0.47472	0.31195	0.55054	0.69047
elav-Gal4 x w1118	Embryo	1st	2nd	3rd	pupa
biological replicate 1 (550 embryos)	8.5	8.2	3.3	2.7	12.1
biological replicate 2 (550 embryos)	10.7	10.8	5.2	4.7	8.2
biological replicate 3 (550 embryos)	11.5	7.6	3.9	4.5	10.4
mean	10.2333	8.86667	4.13333	3.96667	10.2333
standard deviation	1.55349	1.70098	0.971253	1.10151	1.95533
One-way ANOVA with pairwise comparison against w1118	0.61826	0.98769	0.53612	0.62775	0.54251
UAS-Nep4A x w1118	Embryo	1st	2nd	3rd	pupa
biological replicate 1 (230 embryos)	10.6	10.8	5.6	3.7	11.7
biological replicate 2 (210 embryos)	10.2	8.9	4.3	5.2	11.3
biological replicate 3 (220 embryos)	10.7	9.2	4.9	3.9	13.6
mean	10.5	9.63333	4.93333	4.26667	12.2
standard deviation	0.264575	1.02144	0.650641	0.814453	1.22882
One-way ANOVA with pairwise comparison against w1118	0.66749	0.71536	0.16287	0.45502	0.50704
UAS-nep4 RNAi x w1118	Embryo	1st	2nd	3rd	pupa
biological replicate 1 (260 embryos)	12.3	9.2	4.1	3.5	10.4
biological replicate 2 (220 embryos)	9.6	10.9	4.6	4.6	13.3
biological replicate 3 (210 embryos)	9.2	7.7	3.9	4.2	9.7
mean	10.3667	9.26667	4.2	4.1	11.1333
standard deviation	1.68622	1.60104	0.360555	0.556776	1.90875
One-way ANOVA with pairwise comparison against w1118	0.70108	0.8637	0.41961	0.5155	0.93495
w1118	Embryo	1st	2nd	3rd	pupa
biological replicate 1 (550 embryos)	9.3	6.3	2	1.3	13.4
biological replicate 2 (550 embryos)	11.2	12.3	4.3	4.6	10.1
biological replicate 3 (550 embryos)	12.2	8.1	4.2	4.1	10.3
mean	10.9	8.9	3.5	3.33333	11.2667
standard deviation	1.47309	3.07896	1.3	1.77858	1.85023
