# Supplementary material for: Drosophila neprilysins control insulin signaling and food intake via cleavage of regulatory peptides
Source: eLife. 2016 Dec 6;5:e19430. doi: 10.7554/eLife.19430 (PMC5140268; doi:10.7554/eLife.19430)
Supplement: Figure 1—source data 2. — 3rd instar larvae where grouped into genotype-specific cohorts of 10 individuals. The weights of at least five cohorts per genotype were averaged to calculate the mean weight of one respective larva. P values marked in bold indicate statistically significant deviations from the respective controls. For size measurements, animals where photographed on scale paper and individual lengths were calculated with Adobe Photoshop. P values marked in bold indicate statistically significant deviations from the respective controls. DOI: http://dx.doi.org/10.7554/eLife.19430.005 [file elife-19430-fig1-data2.xls]

## Sheet: Tabelle1
Figure 1B Size and weight measurements		Calculation of relative units (measure tool, Adobe Photoshop)		Calculation of relative units (measure tool, Adobe Photoshop)		Calculation of relative units (measure tool, Adobe Photoshop)		Calculation of relative units (measure tool, Adobe Photoshop)		Calculation of relative units (measure tool, Adobe Photoshop)		Calculation of relative units (measure tool, Adobe Photoshop)		Calculation of relative units (measure tool, Adobe Photoshop)		Calculation of relative units (measure tool, Adobe Photoshop)		Calculation of relative units (measure tool, Adobe Photoshop)		Calculation of relative units (measure tool, Adobe Photoshop)		Calculation of relative units (measure tool, Adobe Photoshop)		Calculation of relative units (measure tool, Adobe Photoshop)		Calculation of relative units (measure tool, Adobe Photoshop)		Calculation of relative units (measure tool, Adobe Photoshop)
		1 mm=3.7 relative units		1mm=3.7 relative units		1mm=3.7 relative units		1mm=3.9 relative units		1mm=3.7 relative units		1mm=3.9 relative units		1mm=3.9 relative units		1mm=3.7 relative units		1mm=3.9 relative units		1mm=3.7 relative units		1mm=3.7 relative units		1mm=3.7 relative units		1mm=3.7 relative units		1mm=3.7 relative units
	mef2-Gal4 x UAS-Nep4A		mef2-Gal4 x UAS-Nep4A inact.		mef2-Gal4 x UAS-nep4 RNAi		repo-Gal4 x UAS-Nep4A		repo-Gal4 x UAS-nep4 RNAi		repo-Gal4 x UAS-nep4 RNAi, UAS-Nep4A		elav-Gal4 x UAS-Nep4A		elav-Gal4 x UAS-nep4 RNAi		mef2-Gal4 x w1118		repo-Gal4 x w1118		elav-Gal4 x w1118		UAS-Nep4A x w1118		UAS-nep4 RNAi x w1118		w1118
	mass (cohort)	length (relative units / individual)	mass (cohort)	length (relative units / individual)	mass (cohort)	length (relative units / individual)	mass (cohort)	length (relative units / individual)	mass (cohort, mg)	length (relative units / individual)	mass (cohort, mg)	length (relative units / individual)	mass (cohort)	length (relative units / individual)	mass (cohort, mg)	length (relative units / individual)	mass (cohort)	length (relative units / individual)	mass (cohort)	length (relative units / individual)	mass (cohort)	length (relative units / individual)	mass (cohort)	length (relative units / individual)	mass (cohort)	length (relative units / individual)	mass (g / cohort)	length (relative units / individual)
	0.00958	11.1	0.0182	17.3	0.01748	16	0.01952	19.3	0.01548	13.6	0.01884	15.45	0.01968	15.7	0.01718	16.4	0.01864	16	0.01764	16	0.0226	16	0.01786	16.9	0.01792	17.1	0.01863	17.8
	0.00715	16.6	0.0176	17.7	0.01565	17	0.01666	18.4	0.0142	18.3	0.01872	17.2	0.01726	15.6	0.016	16.7	0.01718	17.3	0.01626	18.2	0.01902	17.7	0.01926	16.2	0.01821	16.8	0.01844	17.2
	0.00777	12.5	0.0168	16.3	0.0185	17.8	0.01766	18.7	0.0157	16.1	0.01774	17.8	0.01758	18.9	0.01832	17.4	0.01914	17.8	0.01762	16.5	0.01906	17.5	0.01809	18.1	0.01834	17.2	0.01932	15.9
	0.00886	12.1	0.018	15.4	0.01885	17.1	0.01792	17.7	0.01366	15.7	0.01762	17.35	0.01796	17.2	0.0172	17.3	0.01816	16	0.01712	15.8	0.01928	15.88	0.01723	17.8	0.0191	17.7	0.0184	8
	0.0073	15	0.0184	17.3	0.01627	14.4	0.01746	18	0.01356	14.2	0.0181	17.69	0.01754	14	0.01786	16.8	0.0196	17	0.0189	15.9	0.0169	16.9	0.01769	15.5	0.01756	15.1	0.01696	12
	0.00894	12.5		16.4	0.01703	14.1		19		17		17.68		15.5		16.8	0.0171	18.5	0.01768	15.7		15	0.01657	17.2	0.01702	17.2	0.01691	16
		14.1		17.3		15.9		15.5		13.4		16.63		17.7		16.6		15.6		15.6		14.5		15.3		16.1		17.1
		12.3		18.1		14.3		14.6		14.4		19		17		16		15.7		15.1		16.3		15.9		16.9		16.07
		10.5		15.3		15.3		16.6		14		18.47		19		15.2		17.3		16.6		14.5		17.2		16.4		17.45
		12.2		16		16.6		16.9		13.9		17.09		16		15.8		16.5		15		17.2		16.9		17.6		16.64
		9		16.8		14.2		15.3		17.8		16.3		17.6		16.4		17.5		17.4		17.9		16.5		17.1		16.8
		10.6		15.9		16.2		15.5		17.1		18.7		17.4		15.2		15.9		15.7		18.3		16.3		16.3		15.7
		11.9		17.3		14.6		16		17.8		17.75		15.7		16.2		16.1		16.4		16.6		18.1		17.2		17.9
		12.6		16.9		16.4		17		14.3		16.55		17.9		14.8		17.6		17		18.1		17.6		16.6		17.25
		8.9		17.5		16.1		17.5		14.3		19.23		14.1		16.6		17.5		15.4		16.33		17.9		15.35		22.8
		11.7		16.3		18.2		14		15.3		16.7		15.1		17		18.9		18.4		17.4		16.3		17.2		16.62
		13.9		15.5		16.8		14.9		14.1		17.54		14.5		17.3		16		18.8		17.7		17.1		16.9		15.84
		10.1		16.3		16.5		15.6		15.31		17.89		17.5		16.6		18.2		18.6		17.4		18.2		17.6		16.2
		11.8		17.2		17.1		19.2		15.31		16.1		19.7		17.3		17.6		18		16.1		18.6		17.2		16.4
		10.8		17.4		17.9		18.3		15.6		16.68						14.9		15.5				15.8		16.1		16.5
		8		15.6		17.8		16.3		16.7		16.13						16.4		19.8				16.8		16.9		16.2
		10.1		16.9		13.24		18.8		17		16.65						15.6		15.1								17.9
		14.4		15.8		15.3		15.7		16.1		16.72						17.4		16.5								17.6
		14.8		17.1		15.8		15.3		17.5		17.08						16.5		16.33								15.8
		10.3		17		15.7		13.7		15		15.82						18.3		16.3								17.5
		12.8		16.2		16.5												16.5		16.5								20
		12.3		16.6		15.6												17.6		17.6								17.5
		11.1		17.6		16.6												18.5		15.5								16.6
		13.05		15.8		16.9												16.3		16								14.8
		11.84		16.7		15.6												17.5		19.1								15.9
		11.5				17																						16.8
		10.1				16.3																						17.6
		9.7				16.9																						16.7
		12.7				16																						18.1
		10				15.1																						17.1
		12.5				16.1																						16.6
		13.47				17																						16
		16.5				18.2																						17.8
		10.6				17																						15.8
		12.3				15.6																						16.8
		11.3				17.6																						16.41
		8.7				17																						15.9
		10.5				16.8																						16.5
		12				17.3																						16.8
		8.5				16.1																						17.3
		11.3				16																						16.3
		11.2				15.5																						17
		12.57				17.7																						17.4
		8				18.4																						15
		13.1				17.1																						16.5
		10.4				17.6																						16.6
		13.8				17.5																						16.5
		11.3				17.3																						15.3
		12.4				18.8																						16.3
		13.6				16.3																						16.2
		12.5				16.7																						19
		9.9				16.6																						16.4
		14				16.4																						17.7
		9.3				17																						16.9
		13.2				18.1																						16
	mef2-Gal4 x UAS-Nep4A		mef2-Gal4 x UAS-Nep4A inact.		mef2-Gal4 x UAS-nep4 RNAi		repo-Gal4 x UAS-Nep4A		repo-Gal4 x UAS-nep4 RNAi		repo-Gal4 x UAS-nep4 RNAi, UAS-Nep4A		elav-Gal4 x UAS-Nep4A		elav-Gal4 x UAS-nep4 RNAi		mef2-Gal4 x w1118		repo-Gal4 x w1118		elav-Gal4 x w1118		UAS-Nep4A x w1118		UAS-nep4 RNAi x w1118		w1118
	mean mass (g / cohort)	mean length (relative units / individual)	mean mass (g / cohort)	mean length (relative units / individual)	mean mass (g / cohort)	mean length (relative units / individual)	mean mass (g / cohort)	mean length (relative units / individual)	mean mass (g / cohort)	mean length (relative units / individual)	mean mass (g / cohort)	mean length (relative units / individual)	mean mass (g / cohort)	mean length (relative units / individual)	mean mass (g / cohort)	mean length (relative units / individual)	mean mass (g / cohort)	mean length (relative units / individual)	mean mass (g / cohort)	mean length (relative units / individual)	mean mass (g / cohort)	mean length (relative units / individual)	mean mass (g / cohort)	mean length (relative units / individual)	mean mass (g / cohort)	mean length (relative units / individual)	mean mass (g / cohort)	mean length (relative units / individual)
	0.00826667	11.7638	0.0178	16.65	0.0172967	16.4757	0.017844	16.712	0.01452	15.5928	0.018204	17.208	0.018004	16.6368	0.017312	16.4421	0.0183033	16.95	0.0175367	16.6777	0.019372	16.7005	0.0177833	16.9619	0.018025	16.7881	0.01811	16.6213
	standard deviation (g / cohort)	standard deviation (relativ units / individual)	standard deviation (g / cohort)	standard deviation (relativ units / individual)	standard deviation (g / cohort)	standard deviation (relativ units / individual)	standard deviation (g / cohort)	standard deviation (relativ units / individual)	standard deviation (g / cohort)	standard deviation (relativ units / individual)	standard deviation (g / cohort)	standard deviation (relativ units / individual)	standard deviation (g / cohort)	standard deviation (relativ units / individual)	standard deviation (g / cohort)	standard deviation (relativ units / individual)	standard deviation (g / cohort)	standard deviation (relativ units / individual)	standard deviation (g / cohort)	standard deviation (relativ units / individual)	standard deviation (g / cohort)	standard deviation (relativ units / individual)	standard deviation (g / cohort)	standard deviation (relativ units / individual)	standard deviation (g / cohort)	standard deviation (relativ units / individual)	standard deviation (g / cohort)	standard deviation (relativ units / individual)
	0.000995825	1.89878	0.000632456	0.759651	0.00124347	1.14649	0.00104856	1.69836	0.00100965	1.47771	0.000556309	0.97742	0.000969474	1.67273	0.00087574	0.755951	0.00102227	1.02747	0.000860271	1.31742	0.00204698	1.16116	0.000901946	0.948934	0.000710823	0.68991	0.000968504	1.75419
	mean mass (mg / individual)	mean length (mm / individual)	mean mass (mg / individual)	mean length (mm / individual)	mean mass (mg / individual)	mean length (mm / individual)	mean mass (mg / individual)	mean length (mm / individual)	mean mass (mg / individual)	mean length (mm / individual)	mean mass (mg / individual)	mean length (mm / individual)	mean mass (mg / individual)	mean length (mm / individual)	mean mass (mg / individual)	mean length (mm / individual)	mean mass (mg / individual)	mean length (mm / individual)	mean mass (mg / individual)	mean length (mm / individual)	mean mass (mg / individual)	mean length (mm / individual)	mean mass (mg / individual)	mean length (mm / individual)	mean mass (mg / individual)	mean length (mm / individual)	mean mass (mg / individual)	mean length (mm / individual)
	0.82	3.18	1.78	4.5	1.73	4.45	1.78	4.29	1.45	4.21	1.8204	4.41231	1.8	4.27	1.73	4.44	1.83	4.34	1.73	4.5	1.92	4.51	1.78	4.58	1.8	4.54	1.81	4.49
	standard deviation (mg / individual)	standard deviation (mm / individual)	standard deviation (mg / individual)	standard deviation (mm / individual)	standard deviation (mg / individual)	standard deviation (mm / individual)	standard deviation (mg / individual)	standard deviation (mm / individual)	standard deviation (mg / individual)	standard deviation (mm / individual)	standard deviation (mg / individual)	standard deviation (mm / individual)	standard deviation (mg / individual)	standard deviation (mm / individual)	standard deviation (mg / individual)	standard deviation (mm / individual)	standard deviation (mg / individual)	standard deviation (mm / individual)	standard deviation (mg / individual)	standard deviation (mm / individual)	standard deviation (mg / individual)	standard deviation (mm / individual)	standard deviation (mg / individual)	standard deviation (mm / individual)	standard deviation (mg / individual)	standard deviation (mm / individual)	standard deviation (mg / individual)	standard deviation (mm / individual)
	0.1	0.51	0.063	0.21	0.124	0.31	0.105	0.435	0.1	0.399	0.0556309	0.250621	0.097	0.429	0.088	0.204	0.102	0.26	0.06	0.36	0.17	0.31	0.09	0.26	0.07	0.19	0.097	0.474
	One-way ANOVA with pairwise comparison against w1118		One-way ANOVA with pairwise comparison against w1118		One-way ANOVA with pairwise comparison against w1118		One-way ANOVA with pairwise comparison against w1118		One-way ANOVA with pairwise comparison against w1118		One-way ANOVA with pairwise comparison against w1118		One-way ANOVA with pairwise comparison against w1118		One-way ANOVA with pairwise comparison against w1118		One-way ANOVA with pairwise comparison against w1118		One-way ANOVA with pairwise comparison against w1118		One-way ANOVA with pairwise comparison against w1118		One-way ANOVA with pairwise comparison against w1118		One-way ANOVA with pairwise comparison against w1118
	8.53735e-09	0	0.27469	0.93213	0.2349	0.5913	0.49477	0.8271	0.00020083	0.01185	0.85255	0.12019	0.63915	0.97301	0.129	0.66743	0.7436	0.34643	0.05663	0.87702	0.31391	0.8545	0.55891	0.40059	0.86587	0.67351
	One-way ANOVA with pairwise comparison against mef2-Gal4 x w1118		One-way ANOVA with pairwise comparison against mef2-Gal4 x w1118		One-way ANOVA with pairwise comparison against mef2-Gal4 x w1118		One-way ANOVA with pairwise comparison against repo-Gal4 x w1118		One-way ANOVA with pairwise comparison against repo-Gal4 x w1118		One-way ANOVA with pairwise comparison against repo-Gal4 x w1118		One-way ANOVA with pairwise comparison against elav-Gal4 x w1118		One-way ANOVA with pairwise comparison against elav-Gal4 x w1118
	9.18533e-09	0	0.23081	0.20357	0.15657	0.05896	0.60558	0.93305	0.000456936	0.00577	0.17098	0.10167	0.19043	0.89232	0.06026	0.42157
	One-way ANOVA with pairwise comparison against UAS-Nep4A x w1118				One-way ANOVA with pairwise comparison against UAS-nep4 RNAi x w1118		One-way ANOVA with pairwise comparison against UAS-Nep4A x w1118		One-way ANOVA with pairwise comparison against repo-Gal4 x UAS-nep4 RNAi, UAS-Nep4A		One-way ANOVA with pairwise comparison against UAS-nep4 RNAi x w1118		One-way ANOVA with pairwise comparison against UAS-Nep4A x w1118		One-way ANOVA with pairwise comparison against UAS-nep4 RNAi x w1118
	8.57092e-09	0			0.24131	0.24403	0.91999	0.55186	9.74763e-05	3.56248e-05	0.65844	0.10567	0.70506	0.44878	0.1695	0.1384
									One-way ANOVA with pairwise comparison against UAS-nep4 RNAi x w1118		One-way ANOVA with pairwise comparison against UAS-Nep4A x w1118
									8.29625e-05	0.00143	0.38914	0.3934
