# Supplementary material for: Drosophila neprilysins control insulin signaling and food intake via cleavage of regulatory peptides
Source: eLife. 2016 Dec 6;5:e19430. doi: 10.7554/eLife.19430 (PMC5140268; doi:10.7554/eLife.19430)
Supplement: Figure 3—source data 1. — Depicted are dye intensities (no. of detected pixels) within the intestines of animals of the indicated genotype. At least six individuals per genotype and time point were analyzed. P values marked in bold indicate statistically significant deviations from the respective controls. DOI: http://dx.doi.org/10.7554/eLife.19430.010 [file elife-19430-fig3-data1.xls]

## Sheet: Tabelle1
Figure 3 Feeding assay
		mef2-Gal4 x w1118								mef2-Gal4 x UAS-Nep4A								mef2-Gal4 x UAS-nep4 RNAi								mef2-Gal4 x UAS-Nep4A inact.
	timepoint	5min	10min	20min	40min				timepoint	5min	10min	20min	40min				timepoint	5min	10min	20min	40min				timepoint	5min	10min	20min	40min
number of detected pixels								number of detected pixels								number of detected pixels								number of detected pixels
biological replicate 1		24495	55947	142891	179961			biological replicate 1		24890	27945	60699	101166			biological replicate 1		14333	21907	80045	193303			biological replicate 1		35214	75285	171432	219827
biological replicate 2		27900	56386	222343	149369			biological replicate 2		27403	14690	40590	76598			biological replicate 2		25261	39244	101824	137605			biological replicate 2		18981	80337	188032	193423
biological replicate 3		6822	64180	149679	132454			biological replicate 3		28631	31528	86981	56275			biological replicate 3		34067	52882	87583	201011			biological replicate 3		21812	89115	153693	142178
biological replicate 4		39814	86099	79428	234404			biological replicate 4		15511	41766	63523	108200			biological replicate 4		13956	21072	129399	205323			biological replicate 4		30595	82374	112168	142115
biological replicate 5		28083	69740	112492	260940			biological replicate 5		36569	35624	60312	60438			biological replicate 5		15970	18958	124836	137499			biological replicate 5		22583	79532	155405	150481
biological replicate 6		39252	78708	156270	218718			biological replicate 6		38544	59108	37987	106513			biological replicate 6		26598	30046	100559	182603			biological replicate 6		27108	74864	127374	190014
biological replicate 7				145653				biological replicate 7								biological replicate 7			27662		235291			biological replicate 7
biological replicate 8				174297				biological replicate 8								biological replicate 8								biological replicate 8
biological replicate 9				138692				biological replicate 9								biological replicate 9								biological replicate 9
mean number of detected pixels		27727.7	68510	146861	195974			mean number of detected pixels		28591.3	35110.2	58348.7	84865			mean number of detected pixels		21697.5	30684.8	104041	176224			mean number of detected pixels		26048.8	80251.2	151351	173006
standard deviation		12054.4	12152.8	39305.1	50354.7			standard deviation		8353.53	14843.3	17809.7	23500.2			standard deviation		8205.96	12118.8	19693.5	35997.9			standard deviation		6094.37	5239.9	27859.9	32589.3
mean number of detected pixels (%)		0.14	0.34	0.74	1			mean number of detected pixels (%)		0.146	0.179	0.298	0.433			mean number of detected pixels (%)		0.11	0.16	0.53	0.9			mean number of detected pixels (%)		0.13	0.414	0.77	0.88
standard deviation (%)		0.06	0.06	0.2	0.25			standard deviation (%)		0.043	0.076	0.091	0.12			standard deviation (%)		0.042	0.062	0.1	0.184			standard deviation (%)		0.03	0.027	0.142	0.166
							One-way ANOVA with pairwise comparisons against mef2-Gal4 x w1118			0.88817	0.00165	0.000194127	0.000625192		One-way ANOVA with pairwise comparisons against mef2-Gal4 x w1118			0.33498	0.000145116	0.02923	0.64647		One-way ANOVA with pairwise comparisons against mef2-Gal4 x w1118			0.76703	0.05488	0.81328	0.37036
